# Supplementary material for: Neural correlates of word processing influenced by painful primes
Source: PubMed Central journal article supplement (PMC10798507; doi:10.1371/journal.pone.0295148), 2024-01-19
Supplement: pone.0295148.s002.pdf [file pone.0295148.s002.pdf]

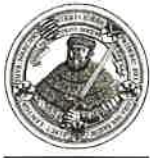

seit 1548

Friedrich-Schiller-Universität Jena

---

**Ethikkommission der Fakultät für Sozial- und Verhaltenswissenschaften  
Ethical Commission of the Faculty of Social and Behavioural Sciences**

Univ.-Prof. Dr. mult. Nikolaus Knoepffler (Präsident, chairman)

**Bestätigung**

Hiermit bestätige ich als Präsident der Ethikkommission der Fakultät für Sozial- und Verhaltenswissenschaften der Friedrich-Schiller-Universität Jena, dass der Ethikantrag zur Studie „*Konditionierung und Extinktion von Schmerzantworten auf neutrale Adjektive*“, der von Herrn Prof. Dr. Thomas Weiß (Institut für Psychologie, Universität Jena) präsentiert wurde, als ethisch unbedenklich qualifiziert wird.

Der Vorgang ist unter der Nummer FSV 15/17 abgelegt.

Wir wünschen allen Beteiligten ein erfolgreiches Forschungsvorhaben.

Jena, den 16.12.2015

A handwritten signature in blue ink, reading 'N. Knoepffler'.

Prof. Dr. mult. Nikolaus Knoepffler
