# Supplementary material for: Neural correlates of word processing influenced by painful primes
Source: PLoS One. 2024 Jan 19;19(1):e0295148. doi: 10.1371/journal.pone.0295148 (PMC10798507; doi:10.1371/journal.pone.0295148)
Supplement: S1 Table — (PDF) [file pone.0295148.s001.pdf]

**S1 Table. Corrected p-values for contrasts regarding main effect of the Region factor.**

**N1:**

Data are reported as mean (SE); \*\*\*:  $p < 0.001$ , \*\*:  $p < 0.01$ , \*:  $p < 0.05$ .

[illegible]

**P2:**

Data are reported as mean (SE); \*\*\*:  $p < 0.001$ , \*\*:  $p < 0.01$ , \*:  $p < 0.05$ .

[illegible]

**P3:**

Data are reported as mean (SE); \*\*\*:  $p < 0.001$ , \*\*:  $p < 0.01$ , \*:  $p < 0.05$ .

[illegible]

**N400:**

Data are reported as mean (SE); \*\*\*:  $p < 0.001$ , \*\*:  $p < 0.01$ , \*:  $p < 0.05$ .

[illegible]

**LPC1:**

Data are reported as mean (SE); \*\*\*:  $p < 0.001$ , \*\*:  $p < 0.01$ , \*:  $p < 0.05$ .

[illegible]

**LPC2:**

Data are reported as mean (SE); \*\*\*:  $p < 0.001$ , \*\*:  $p < 0.01$ , \*:  $p < 0.05$ .

[illegible]
